# Supplementary material for: A Multiwell-Plate Caenorhabditis elegans Assay for Assessing the Therapeutic Potential of Bacteriophages against Clinical Pathogens
Source: PubMed Central journal article supplement (PMC8849058; doi:10.1128/spectrum.01393-21), 2022-02-16
Supplement: spectrum01393-21_supp_1_seq9.pdf [file spectrum01393-21_supp_1_seq9.pdf]

## Supporting Information

### **A multiwell-plate *Caenorhabditis elegans* assay for assessing the therapeutic potential of Bacteriophages against Clinical Pathogens**

**Prasanth Manohar<sup>1,2</sup>, Belinda Loh<sup>1</sup>, Namasivayam Elangovan<sup>3</sup>, Archana Loganathan<sup>4</sup>, Ramesh Nachimuthu\*<sup>4</sup>, Sebastian Leptihn\*<sup>1,5,6</sup>**

<sup>1</sup>*Zhejiang University-University of Edinburgh (ZJE) Institute, Zhejiang University, School of Medicine, Haining, Zhejiang, PR China*

<sup>2</sup>*The Second Affiliated Hospital Zhejiang University (SAHZU), School of Medicine, Hangzhou, Zhejiang, PR China*

<sup>3</sup>*Department of Biotechnology, School of Bioscience, Periyar University, Salem, Tamil Nadu, India*

<sup>4</sup>*Antibiotic Resistance and Phage Therapy Lab, Department of Biomedical Science, School of Biosciences and Technology, Vellore, Tamil Nadu, India*

<sup>5</sup>*Department of Infectious Diseases, Sir Run Run Shaw Hospital, Zhejiang University, School of Medicine, Hangzhou, PR China*

<sup>6</sup>*University of Edinburgh Medical School, Biomedical Sciences, College of Medicine & Veterinary Medicine, The University of Edinburgh, 1 George Square, Edinburgh, EH8 9JZ, United Kingdom*

#### **\*Corresponding authors:**

##### **1. Prof. Dr Ramesh Nachimuthu**

Assistant Professor,  
School of Biosciences and Technology,  
Vellore, Tamil Nadu, India  
E-mail: [drpnramesh@gmail.com](mailto:drpnramesh@gmail.com)

##### **2. Prof. Dr Sebastian Leptihn**

Associate Professor,  
Zhejiang University-University of Edinburgh (ZJE) Institute,  
Zhejiang University, School of Medicine,  
Haining, Zhejiang, PR China  
E-mail: [Leptihn@intl.zju.edu.cn](mailto:Leptihn@intl.zju.edu.cn)

## Supplementary Figure 1

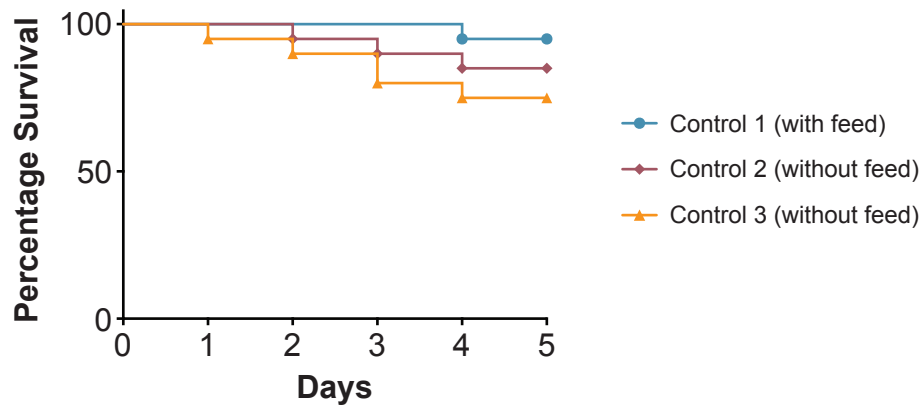

**Supplementary Figure 1:** Survival curves of *C. elegans*. Nematodes were kept in varying growth conditions; Control 1: nematodes were fed with *E. coli* OP50, Control 2 (liquid media) & Control 3 (solid-media): nematodes were not fed. Survival curves were plotted using Kaplan-Meier method and log-rank test was used to analyze the difference in survival rates in GraphPad Prism 7.0.

## Supplementary Figure 2

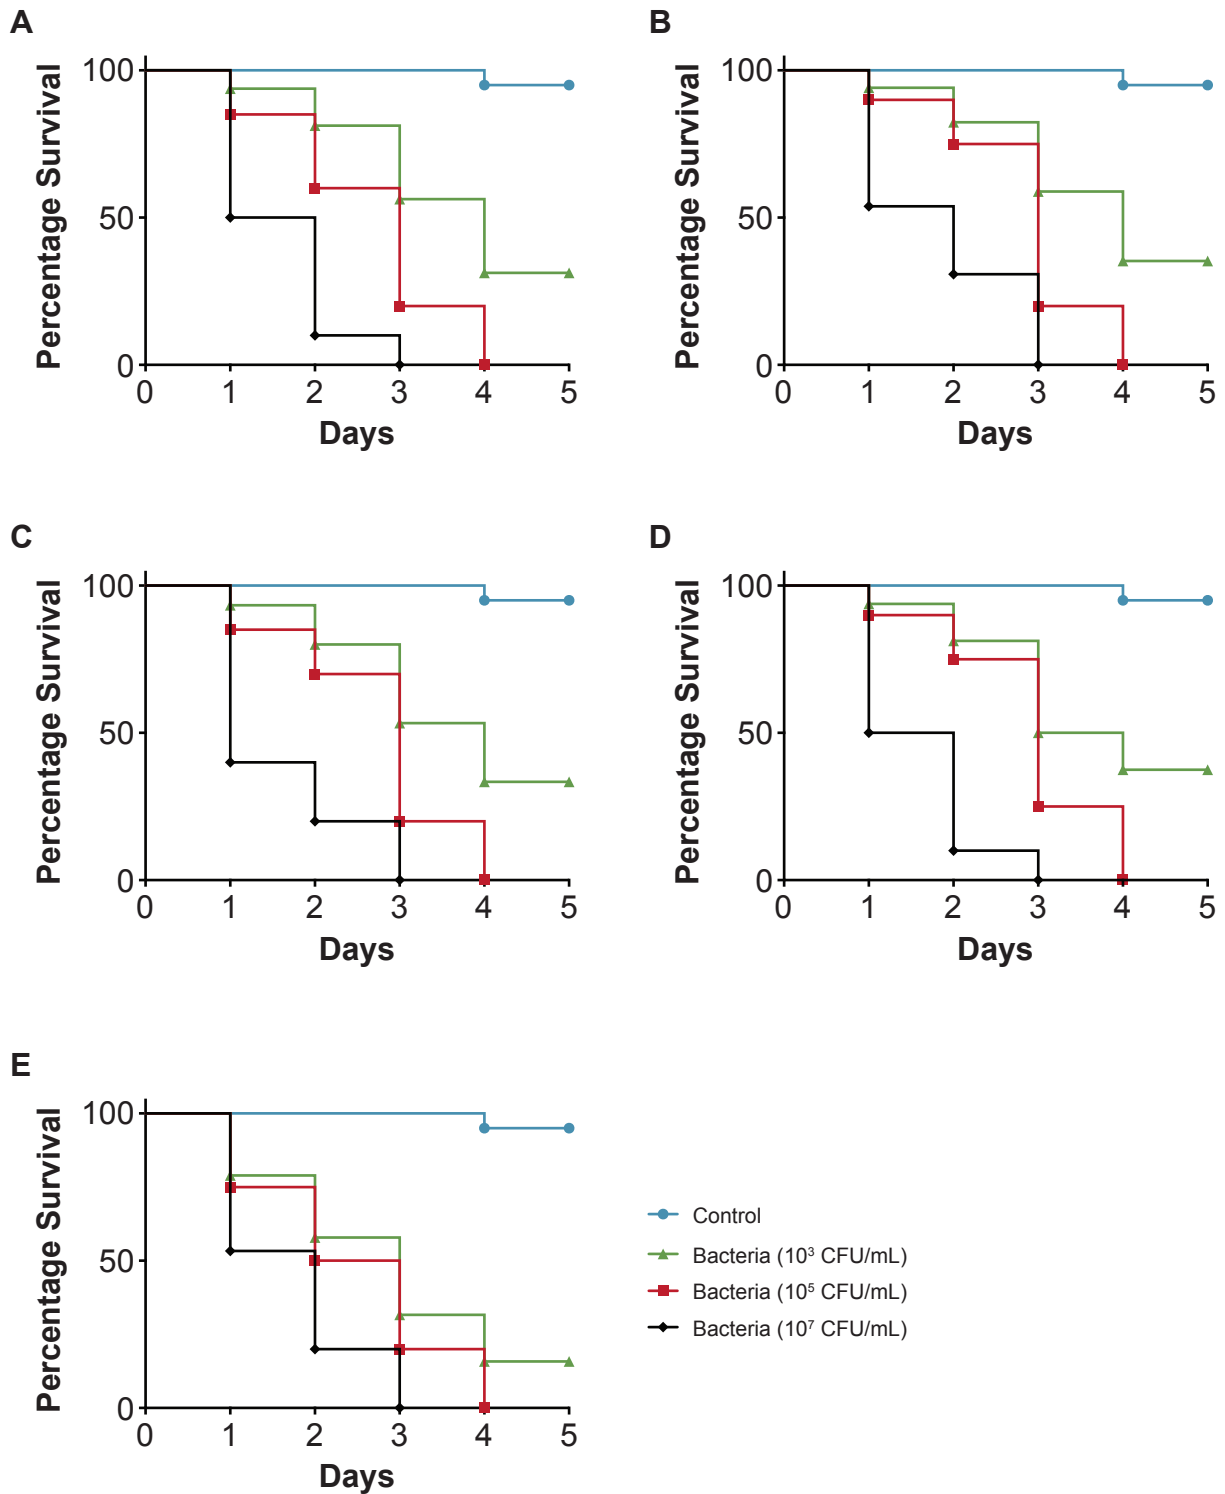

**Supplementary Figure 2:** Survival curves of nematodes (*C. elegans*) when infected with pathogenic bacteria at different concentrations,  $10^3$ ,  $10^5$  and  $10^7$  CFU/mL. (A) *C. elegans* infected with *Escherichia coli* 131; (B) *C. elegans* infected with *Escherichia coli* 311; (C) *C. elegans* infected with *Klebsiella pneumoniae* 235; (D) *C. elegans* infected with *Enterobacter cloacae* 140. The survival curves were plotted using Kaplan-Meier method in GraphPad Prism 7.0.

### Supplementary Figure 3

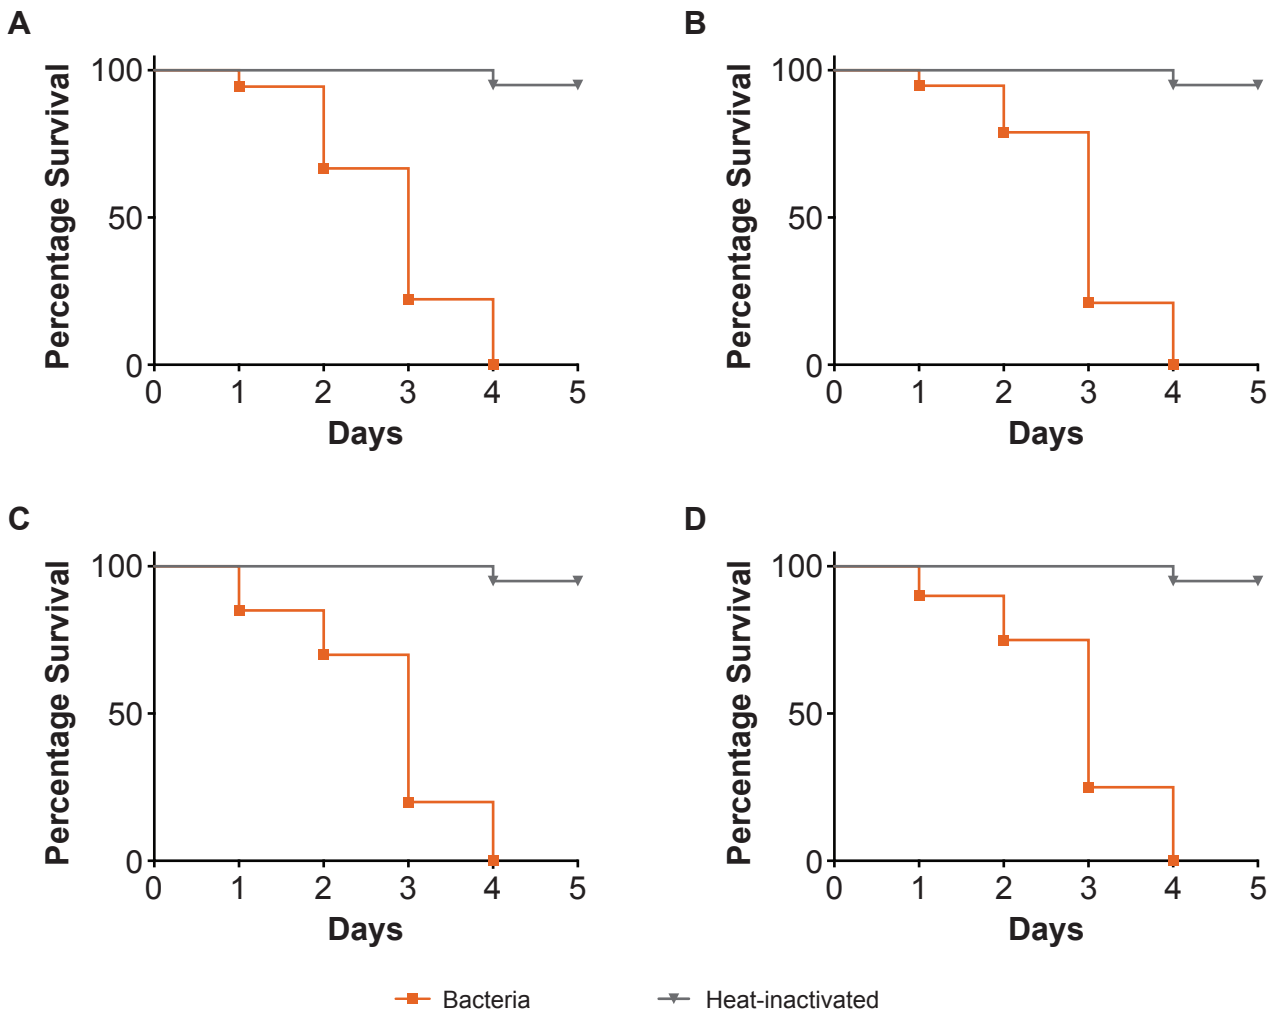

**Supplementary Figure 3:** Survival curves of nematodes (*C. elegans*) when infected with live bacteria and heat-killed bacteria. (A) *C. elegans* infected with *Escherichia coli* 131; (B) *C. elegans* infected with *Escherichia coli* 311; (C) *C. elegans* infected with *Klebsiella pneumoniae* 235; (D) *C. elegans* infected with *Enterobacter cloacae* 140. The survival curves were plotted using Kaplan-Meier method in GraphPad Prism 7.0.
